# Supplementary material for: The single-cell RNA sequencing (scRNA-seq) transcriptome profile of pancreatic islets in three types of diabetic mice and its pathological changes
Source: Research Square preprint supplement (doi:10.21203/rs.3.rs-7225641/v1), 2025-11-19
Supplement: Supplementary file 1 [file 243e6b986ef925e40f79dc24.docx]

**
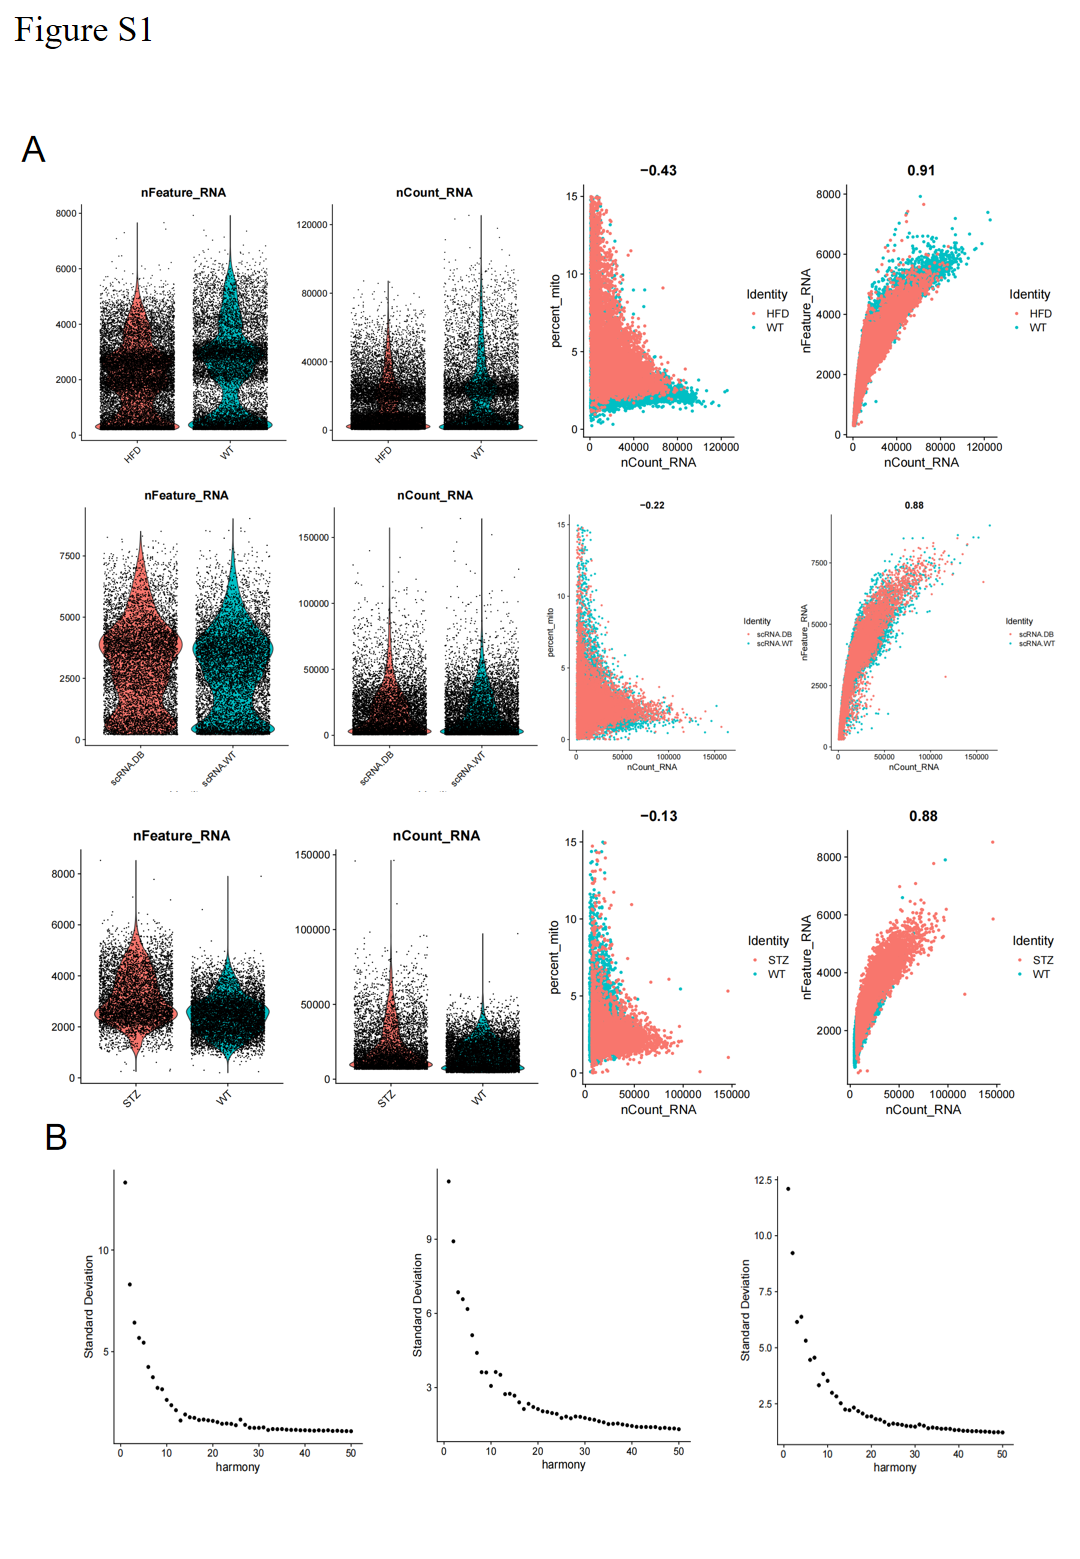
**

**Figure S1 Single cell sequencing data, PCA, ElbowPlot**

(A) In the left picture of the violin after the quality control of RNA-SEQ, 26,163 core cells were identified by HFD, 16157 core cells were identified by DB/DB, and 13640 core cells were identified by STZ. The scatter plot of RNA-Count in each cell and the corresponding identified percent_mito in the figure on the right shows that there is a strong positive correlation between RNA-Count and percent_mito in each group of data. (B) Single cell PCA dimensionality reduction ElbowPlot, HFD selected dims = 1:10, DB/DB selected dims = 1:17, STZ selected dims = 1:14.

**
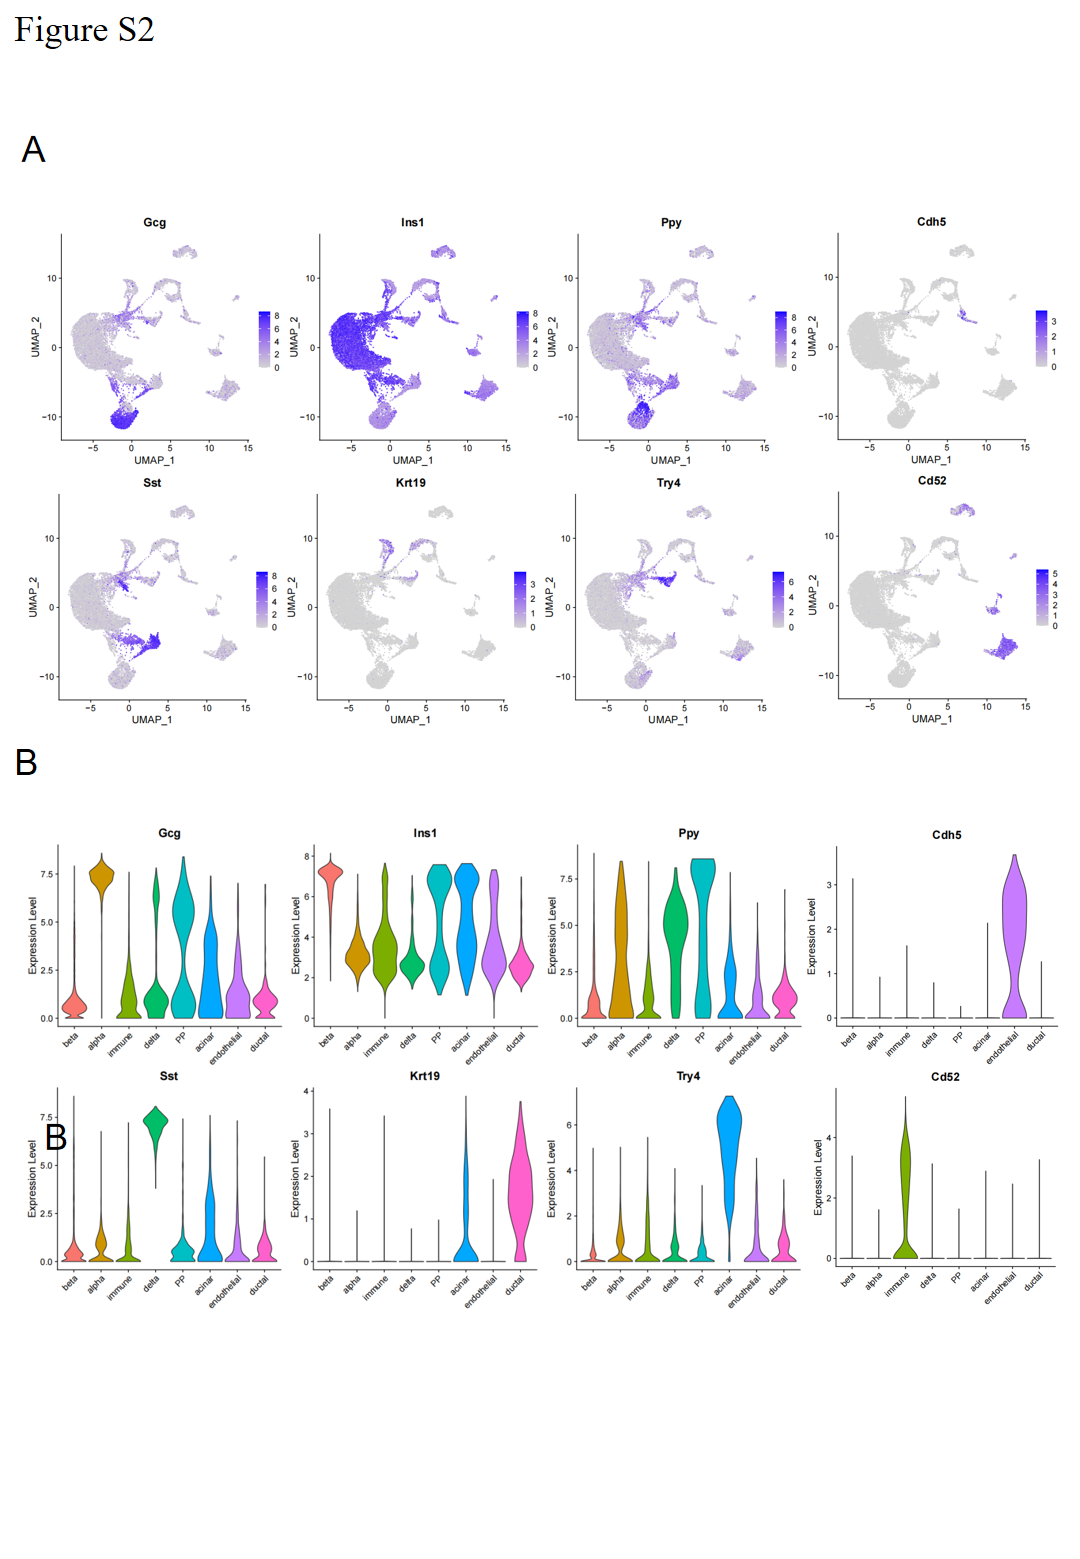
**

**Figure S2 marker gene expression level and violin diagram of each DB/DB cluster.**

(A) Display of the expression levels of marker genes in each DB/DB cluster. Two-dimensional display can more intuitively see the expression level of a certain marker gene in all cells. The darker the color (the bluer), the higher the expression of the gene in these subgroups or cells. (B)The expression levels of marker genes identified by each cluster of DB/DB can be visually compared with the relative expression levels of these markers in all subgroups by means of violin graph. It can be used to measure the specificity of this gene as a marker gene for a certain subgroup.

**
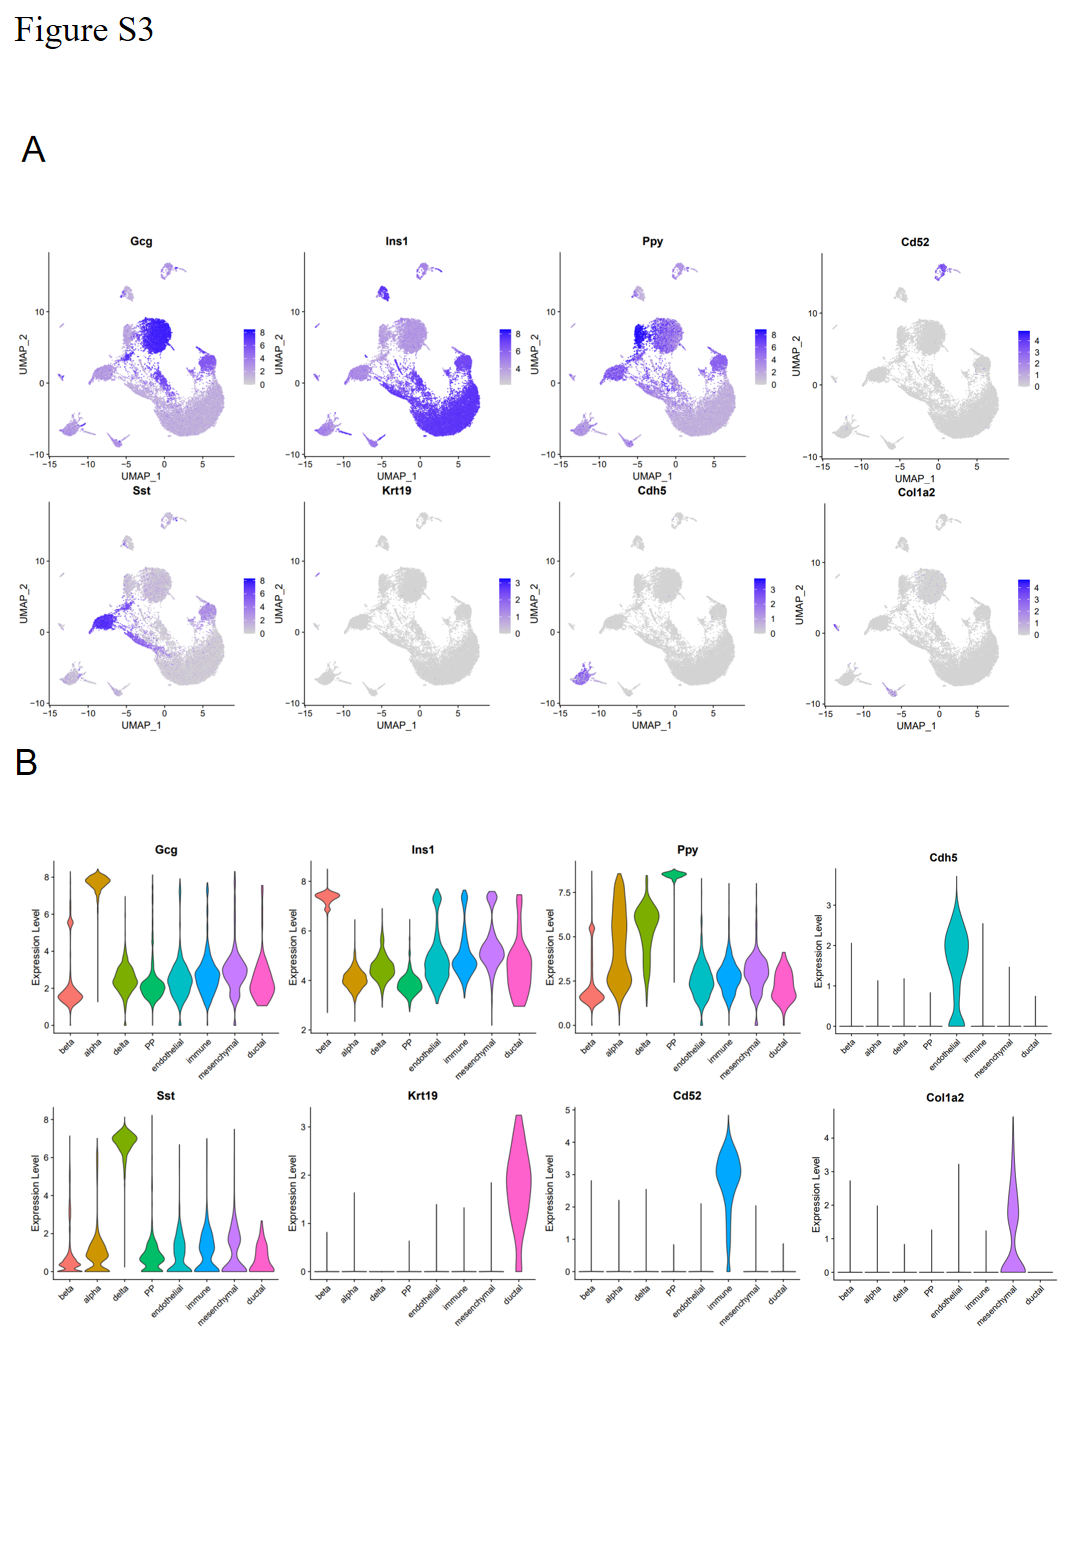
**

**Figure S3 marker gene expression level and violin diagram of HFD cluster.**

(A) Display of expression levels of marker genes in each cluster of HFD. (B) Expression levels of marker genes identified by each cluster of HFD.

**
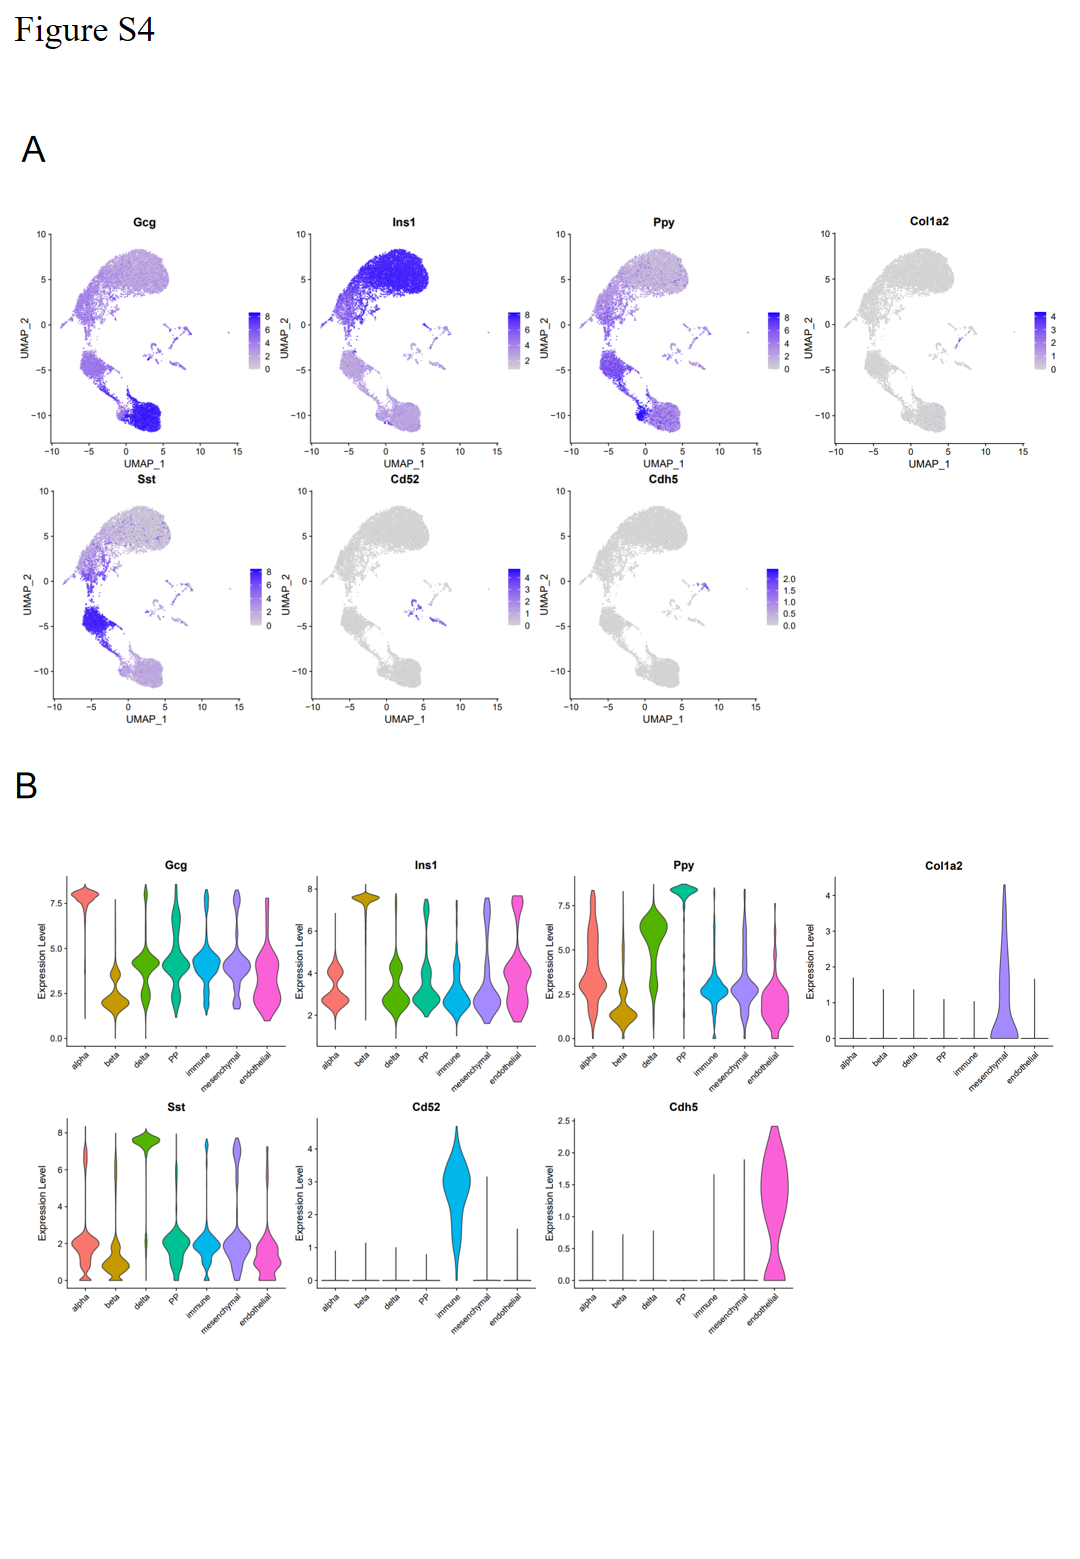
Figure S4 marker gene expression level and violin diagram of STZ cluster.**

(A) Display of expression levels of marker genes in each cluster of STZ. (B) Expression levels of marker genes identified by STZ clusters.

**
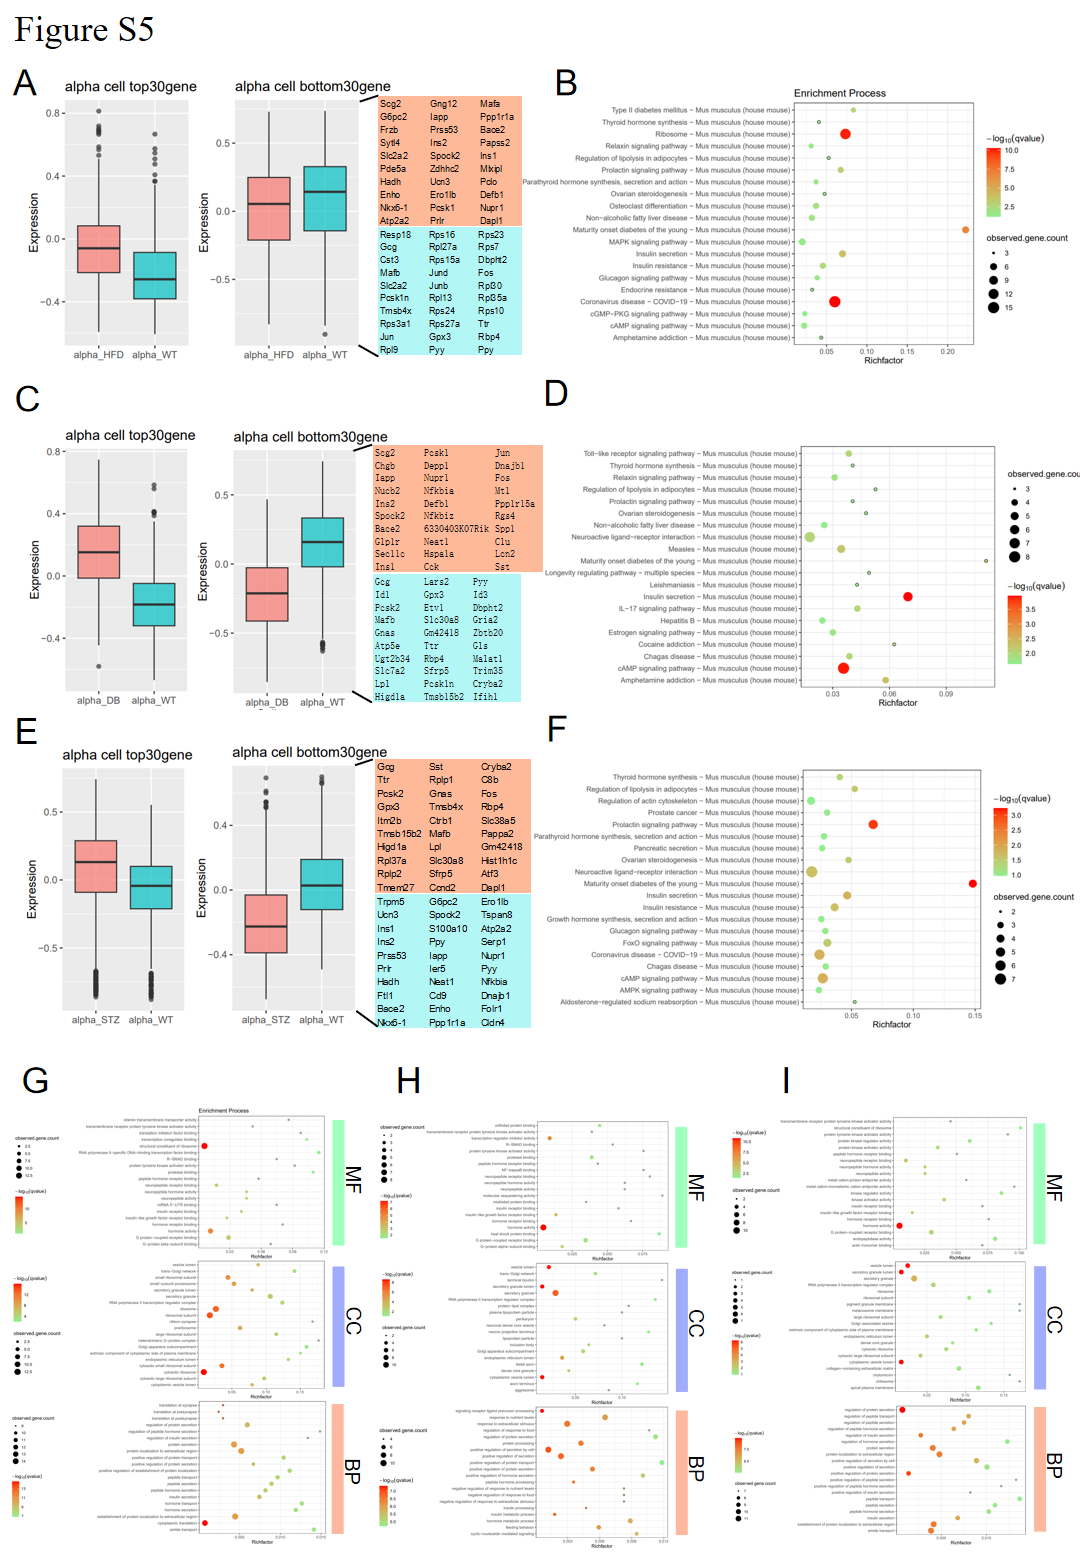
**

**Figure S5 Analysis of differentially expressed genes（DEGs) expression profiles and enrichment analysis of alpha-cell populations(A,C,E)** TEX signature characteristics shown top 30 up- and down-regulated genes compared to wt mice in each group.(A)HFD mice.(C)DB/DB mice.(E)STZ mice.(B,D,F) Top 20 enriched KEGG pathways in (B)HFD mice. (D)DB/DB mice. (F)STZ mice.(G~I)GO analysis enriched and annotated differentially expressed genes in (G)HFD mice, (H)DB/DB mice and (I)STZ mice.

**
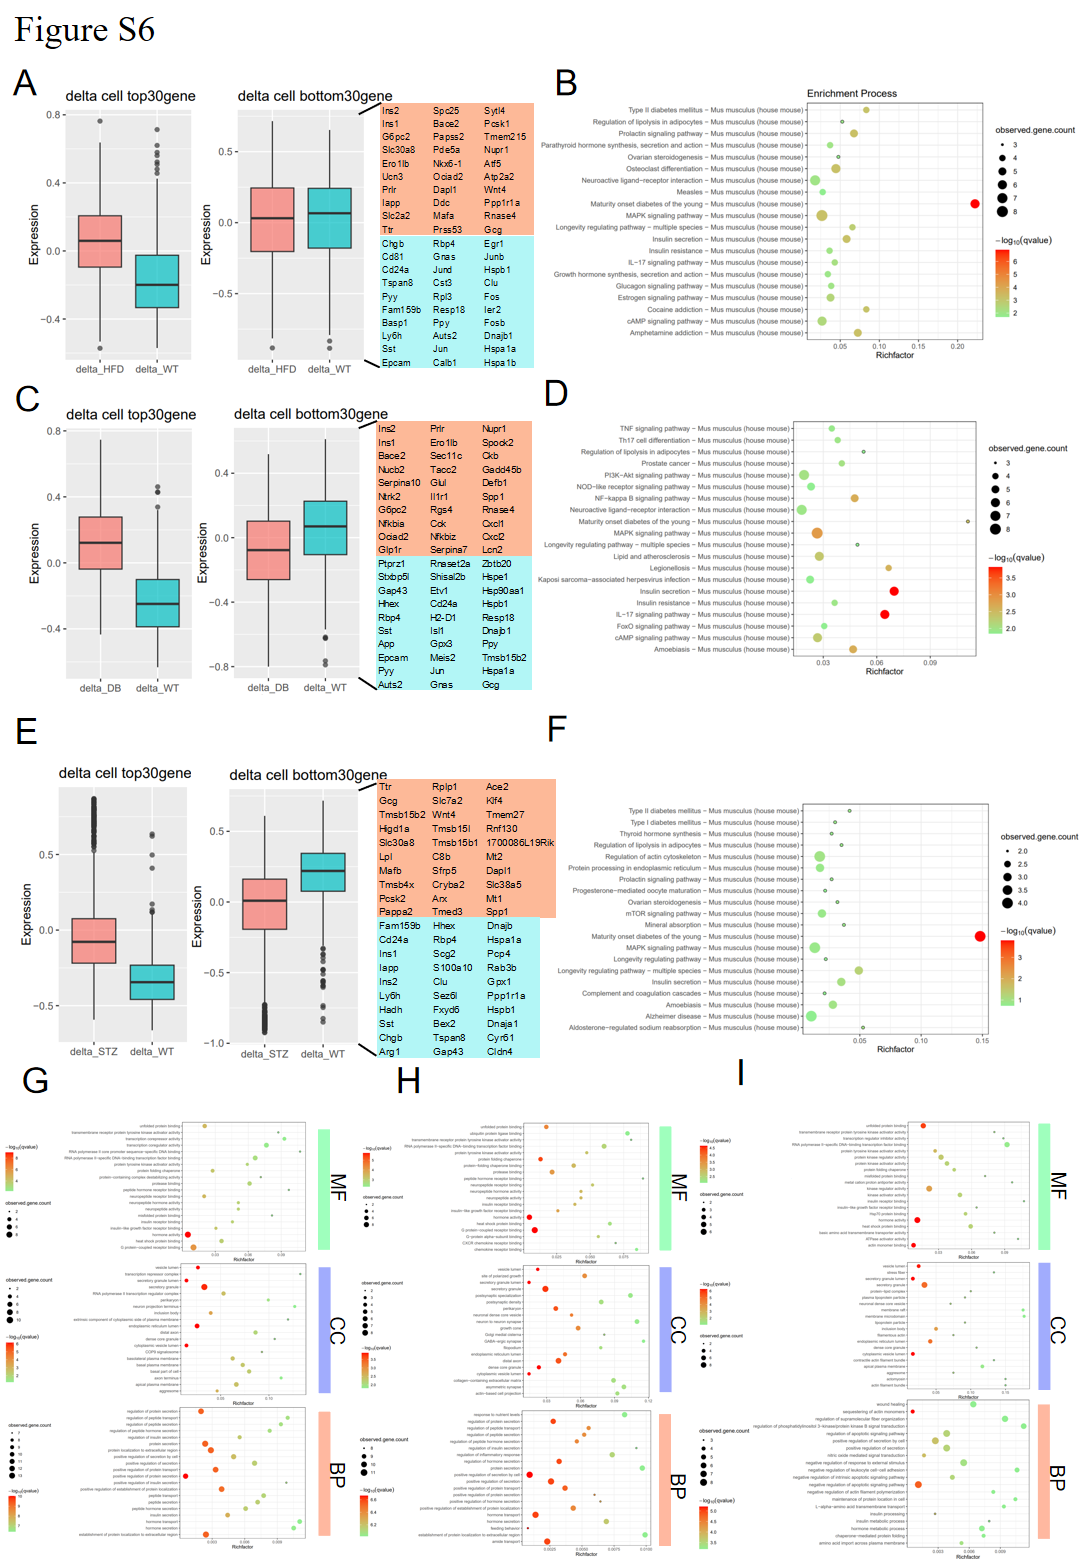
**

**Figure S6 Analysis of differentially expressed genes（DEGs) expression profiles and enrichment analysis of delta-cell populations(A,C,E)** TEX signature characteristics shown top 30 up- and down-regulated genes compared to wt mice in each group.(A)HFD mice.(C)DB/DB mice.(E)STZ mice.(B,D,F) Top 20 enriched KEGG pathways in (B)HFD mice. (D)DB/DB mice. (F)STZ mice.(G~I)GO analysis enriched and annotated differentially expressed genes in (G)HFD mice, (H)DB/DB mice and (I)STZ mice.

**
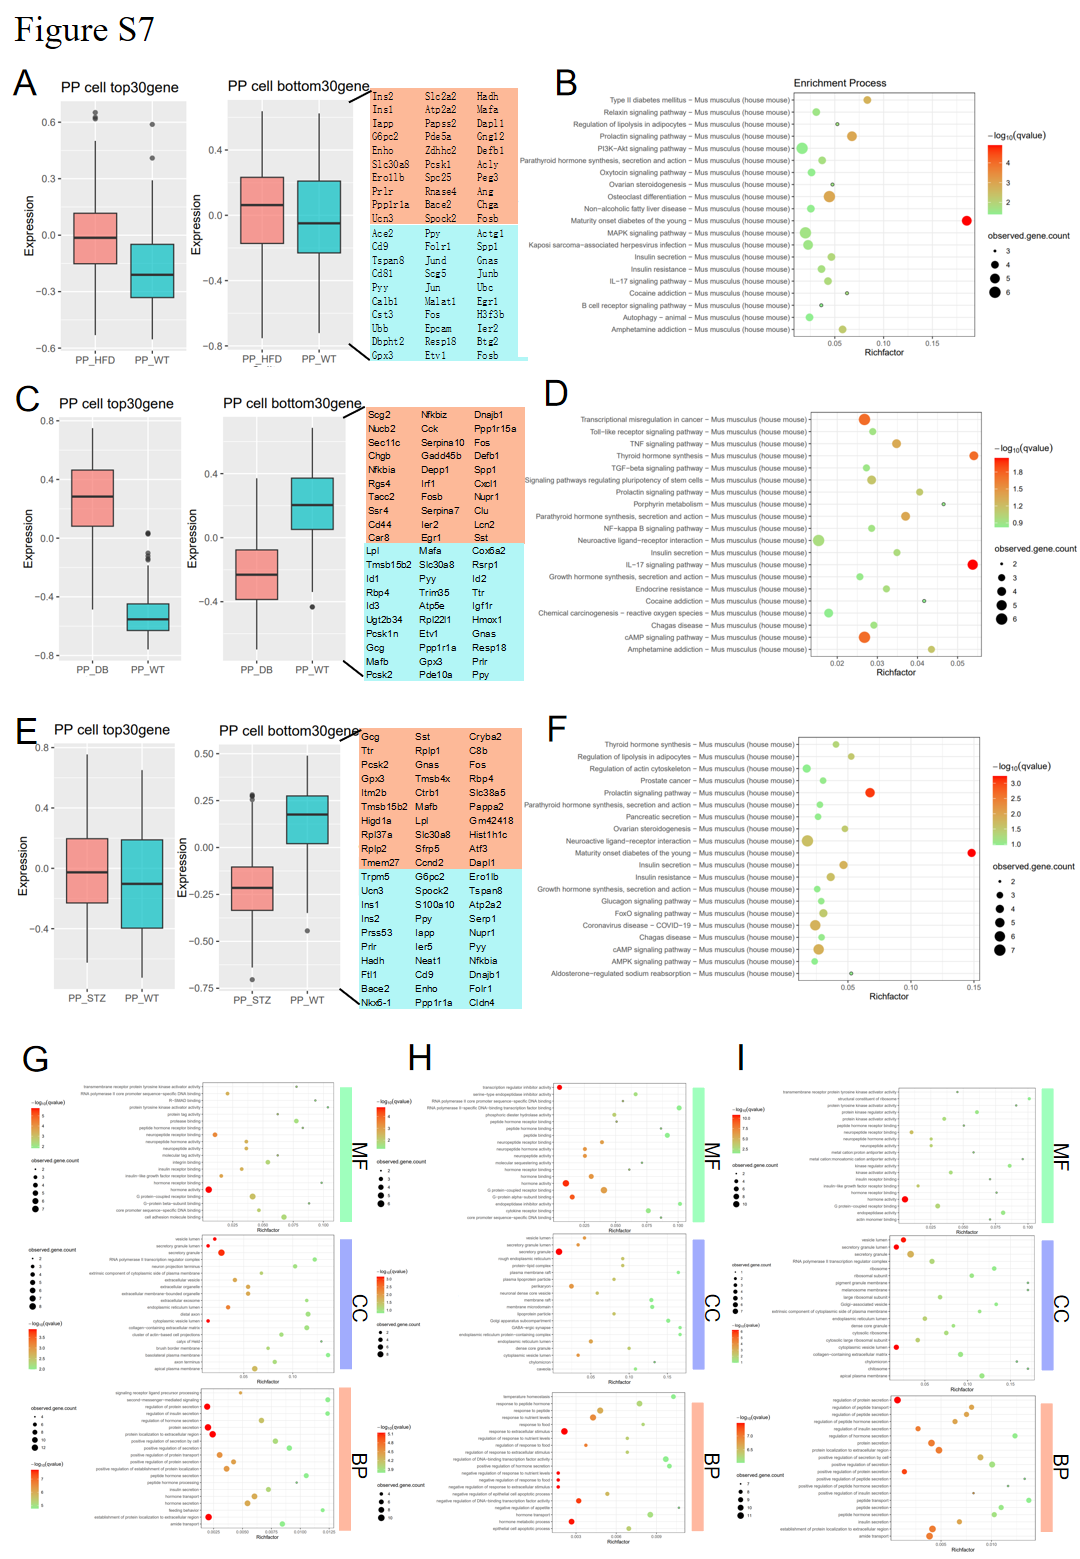
**

**Figure S7 Analysis of differentially expressed genes（DEGs) expression profiles and enrichment analysis of PP-cell populations(A,C,E)** TEX signature characteristics shown top 30 up- and down-regulated genes compared to wt mice in each group.(A)HFD mice.(C)DB/DB mice.(E)STZ mice.(B,D,F) Top 20 enriched KEGG pathways in (B)HFD mice. (D)DB/DB mice. (F)STZ mice.(G~I)GO analysis enriched and annotated differentially expressed genes in (G)HFD mice, (H)DB/DB mice and (I)STZ mice.

**
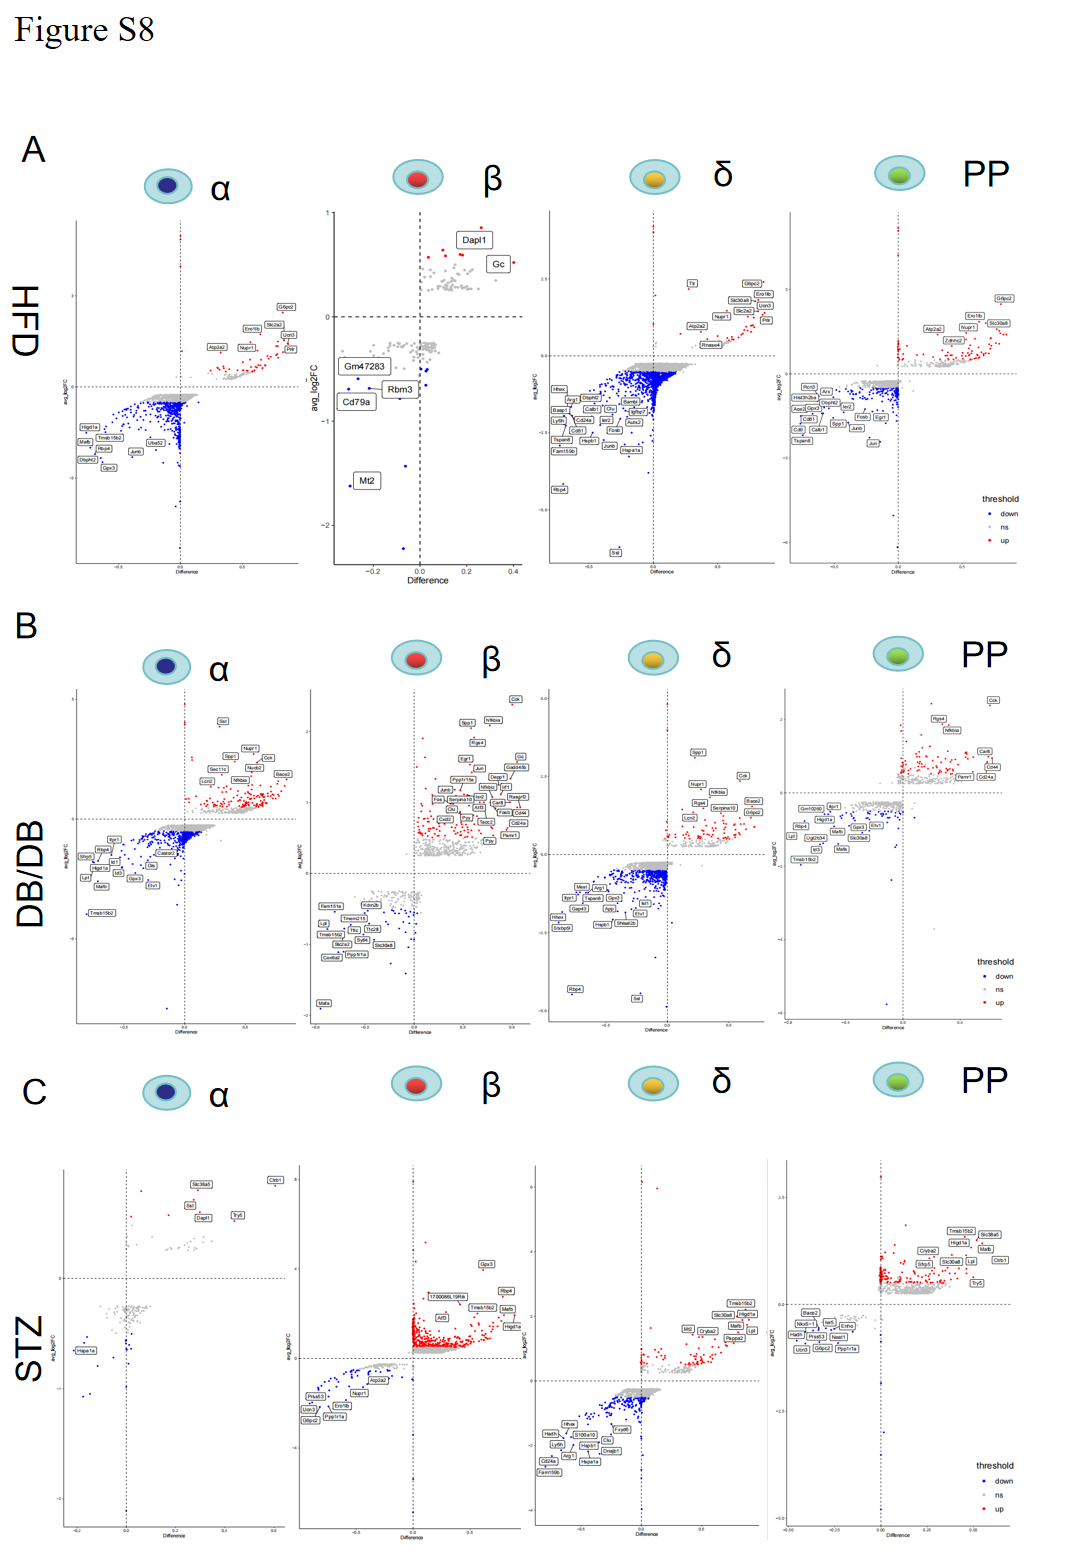
**

**Figure S8 Differential gene expression analysis showed up-regulated and down-regulated genes of α, β, δ and PP cell.**

(A)HFD mice.(B)DB/DB mice.(C)STZ mice. p < 0.05, |log2FC| = 0.5(A~C).
